# Supplementary material for: Influence of UAS Flight Altitude and Speed on Aboveground Biomass Prediction
Source: MDPI journal article supplement (doi:10.3390/rs14091989), 2022-04-21
Supplement: s1 [file s1]

**Supplemental Table S1.** Agisoft Metashape processing parameters for SfM photogrammetry forest reconstruction.

| <b>Parameter</b>              | <b>Setting</b> |
|-------------------------------|----------------|
| <b>Align Photos</b>           |                |
| Accuracy                      | Highest        |
| Generic preselection          | Yes            |
| Reference preselection        | Source         |
| Reset current alignment       | No             |
| Key point limit               | 40,000         |
| Tie Point Limit               | 4000           |
| Apply masks to                | None           |
| <b>Optimize Alignment</b>     |                |
| Adaptive camera model fitting | Yes            |
| <b>Build Dense Cloud</b>      |                |
| Quality                       | High           |
| Depth Filtering               | Mild           |
| Calculate point colors        | Yes            |
| Calculate point confidence    | No             |
